# Supplementary material
Source: PubMed Central journal article supplement (PMC4793582)
Supplement: jadv014011.ww1_default.pdf [file jadv014011.ww1_default.pdf]

## Online Supplementary Material

# First trimester fetal growth restriction and cardiovascular risk factors in school age children: population based cohort study

Vincent W.V. Jaddoe, associate professor of paediatric epidemiology <sup>1,2,3</sup>

Layla L. de Jonge, medical doctor <sup>2,3</sup>

Albert Hofman, professor of epidemiology <sup>2</sup>

Oscar H. Franco, professor of preventive medicine <sup>2</sup>

Eric A.P. Steegers, professor of obstetrics and gynaecology <sup>4</sup>

Romy Gaillard, PhD-student <sup>1,2,3</sup>

### Affiliations

<sup>1</sup>The Generation R Study Group, Erasmus University Medical Center, PO BOX 2040, 3000 CA, Rotterdam, the Netherlands.

<sup>2</sup>Department of Epidemiology, Erasmus University Medical Center, PO BOX 2040, 3000 CA, Rotterdam, the Netherlands.

<sup>3</sup>Department of Paediatrics, Erasmus University Medical Center - Sophia Children's Hospital, PO BOX 2040, 3000 CA, Rotterdam, the Netherlands.

<sup>4</sup>Department of Obstetrics and Gynaecology, Erasmus University Medical Center, PO BOX 2040, 3000 CA, Rotterdam, the Netherlands.

Correspondence to: Vincent W.V. Jaddoe, v.jaddoe@erasmusmc.nl.

## **Contents**

|            |                                                                                                                                                                                       |
|------------|---------------------------------------------------------------------------------------------------------------------------------------------------------------------------------------|
| Figure S1. | Participants Flow Chart in the Generation R Study, Rotterdam, the Netherlands                                                                                                         |
| Figure S2. | First-Trimester Fetal Growth and Clustering of Cardiovascular Risk Factors Adjusted for Gestational Age and Weight at Birth (N = 595)                                                 |
| Table S1   | Associations of Covariates with Childhood Body Fat Outcomes (N = 1,184)                                                                                                               |
| Table S2   | Associations of Covariates with Childhood Blood Pressure (N = 1,125)                                                                                                                  |
| Table S3   | Associations of Covariates with Childhood Metabolic Outcomes (N = 789)                                                                                                                |
| Table S4   | Fetal and Childhood Growth Characteristics (N = 1, 184)                                                                                                                               |
| Table S5   | Non-Response Analysis for First-Trimester Crown to Rump Length Measurement in Full Cohort (N = 8,880)                                                                                 |
| Table S6   | Non-Response Analysis for First-Trimester Crown to Rump Length With and Without Information About Last Menstrual Period and Singleton Live-born Child (N = 4,195)                     |
| Table S7   | Non-Response Analysis for Loss to Follow-Up at the Age of 6 Years (N = 1,619)                                                                                                         |
| Table S8   | Fetal and Childhood Length and Weight Growth from First Trimester Onwards in Children with Clustering of Cardiovascular and Metabolic Risk Factors Adjusted for Confounders (N = 595) |

**Figure S1. Participants Flow Chart in the Generation R Study, Rotterdam, the Netherlands**

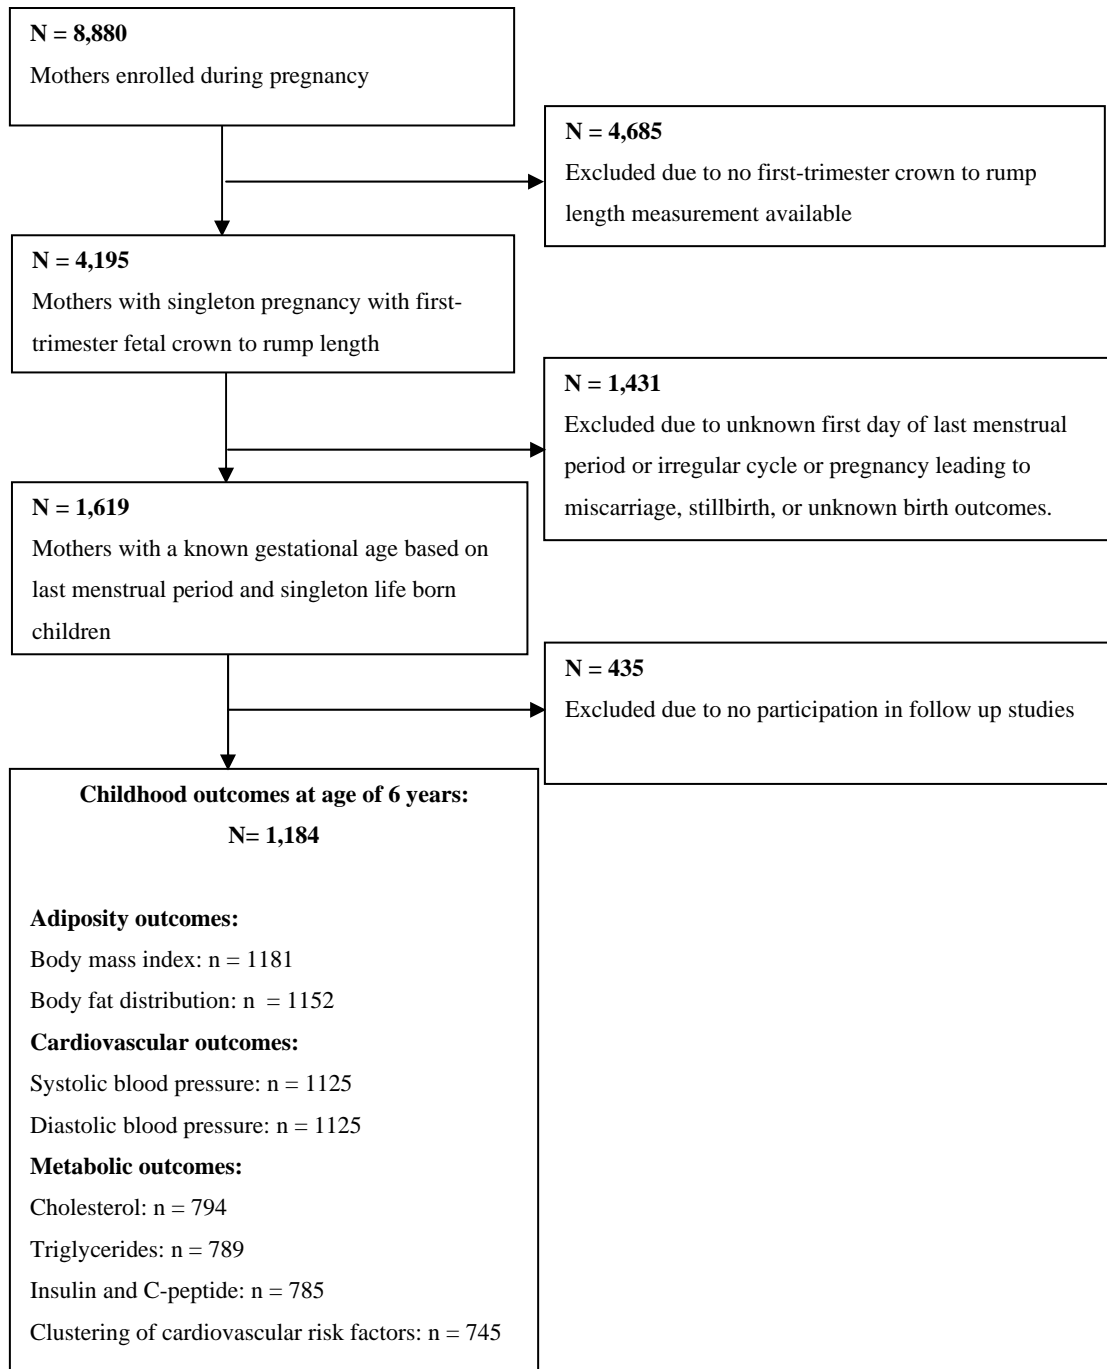

**Figure S2. First-Trimester Fetal Growth and Clustering of Cardiovascular Risk Factors Adjusted for Gestational Age and Weight at Birth (N = 745)<sup>1</sup>**

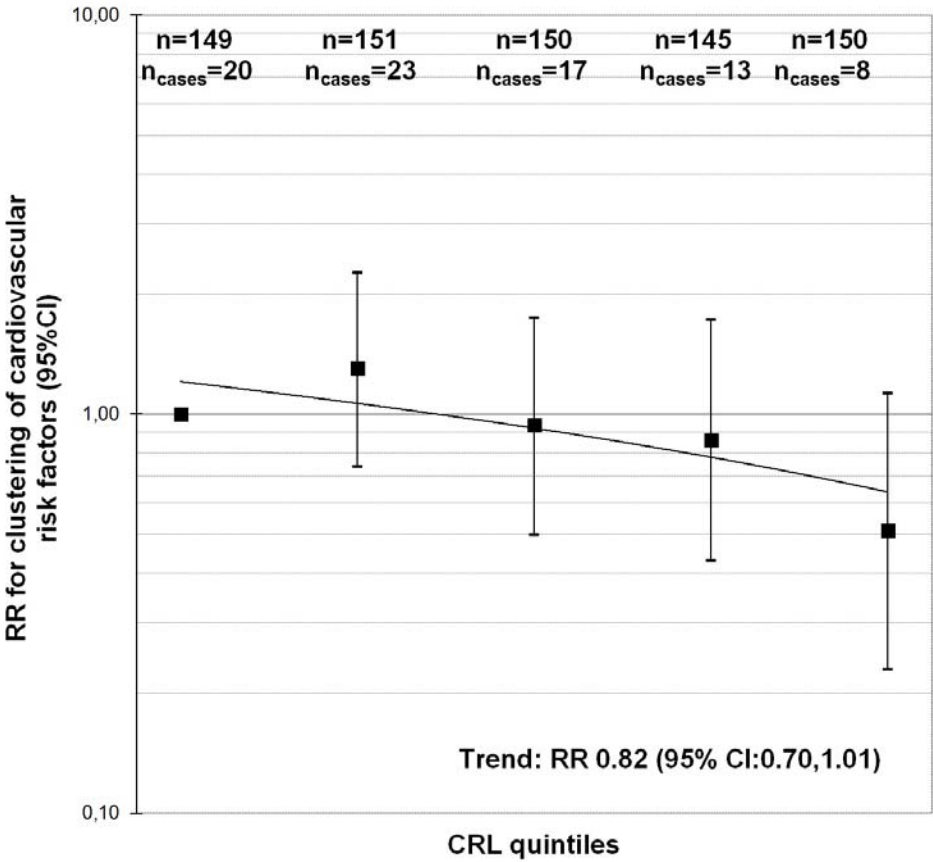

<sup>1</sup>Values are risk ratios (95% confidence interval) from generalized linear models that reflect the risk of childhood clustering of cardiovascular risk factors for first-trimester fetal crown to rump length SDS categories, as compared to the reference group (lowest quintile). Model is adjusted for child sex and age at measurement, maternal duration of last menstrual cycle, age, educational level, ethnicity, parity, pre-pregnancy body mass index, diastolic blood pressure, smoking during pregnancy, folic acid supplement use, breastfeeding duration and gestational age and weight at birth (fetal pathway model).

**Table S1. Associations of Covariates with Childhood Body Fat Outcomes (N = 1, 184)<sup>1</sup>**

|                                                 | Body mass index<br>(kg/m <sup>2</sup> ) | Total fat mass<br>(%)  | Android/Gynoid fat<br>mass ratio (%) |
|-------------------------------------------------|-----------------------------------------|------------------------|--------------------------------------|
| Duration of menstrual cycle, days               | 0.03 (-0.04, 0.10)                      | -0.08 (-0.30, 0.14)    | 0.03 (-0.23, 0.28)                   |
| Child sex                                       |                                         |                        |                                      |
| Boys                                            | <i>Reference</i>                        | <i>Reference</i>       | <i>Reference</i>                     |
| Girls                                           | -0.22 (-0.42, 0.03)*                    | 4.19 (3.64, 4.75)*     | 0.39 (-0.30, 1.09)                   |
| Childhood age at outcome                        | 0.63(0.41, 0.85)*                       | 1.43 (0.66, 2.20)*     | 1.41 (0.51, 2.31)*                   |
| Maternal age, yr                                | -0.03 (-0.05, -0.01)*                   | -0.16 (-0.22, -0.09)*  | -0.13 9-0.21, -0.05)*                |
| Education                                       |                                         |                        |                                      |
| Primary                                         | 0.91 (0.45, 1.37)*                      | 3.04 (1.69, 4.40)*     | 1.44 (-0.21, 3.09)                   |
| Secondary                                       | 0.37 (0.17, 0.57)*                      | 1.95 (1.33, 2.57)*     | 1.48 (0.75, 2.21)**                  |
| Higher                                          | <i>Reference</i>                        | <i>Reference</i>       | <i>Reference</i>                     |
| Ethnicity                                       |                                         |                        |                                      |
| Dutch or European                               | <i>Reference</i>                        | <i>Reference</i>       | <i>Reference</i>                     |
| Non – European                                  | 0.40 (0.19, 0.62)*                      | 1.44 (0.77, 2.11)*     | 0.90 (0.12, 1.68)*                   |
| Parity                                          |                                         |                        |                                      |
| Nulliparous                                     | <i>Reference</i>                        | <i>Reference</i>       | <i>Reference</i>                     |
| Multiparous                                     | 0.02 (-0.17, 0.22)                      | -0.79 (-0.141, -0.18)* | -0.45 (-1.17, 0.26)                  |
| Prepregnancy body mass index, kg/m <sup>2</sup> | 0.13 (0.10, 0.15)*                      | 0.33 (0.25, 0.41)*     | 0.27 (0.18, 0.36)*                   |
| Diastolic blood pressure, mmHg                  | 0.01 (0, 0.02)*                         | 0.04 (0.01, 0.08)*     | 0.02 (-0.02, 0.06)                   |
| Smoking                                         |                                         |                        |                                      |
| Yes                                             | 0.34 (0.09, 0.58)*                      | 1.16 (0.26, 2.06)*     | 1.85 (0.91, 2.79)*                   |
| No                                              | <i>Reference</i>                        | <i>Reference</i>       | <i>Reference</i>                     |
| Folic acid supplement use                       |                                         |                        |                                      |
| Yes                                             | <i>Reference</i>                        | <i>Reference</i>       | <i>Reference</i>                     |
| No                                              | 0.36 (0.15, 0.57)*                      | 1.48 (0.84, 2.11)*     | 1.30 (0.56, 2.05)*                   |
| Breastfeeding duration, month)                  | -0.02 (-0.05, 0.01)                     | -0.09 (-0.18, 0)       | -0.08 (-0.18, 0.03)                  |
| Childhood height at outcome                     | -                                       | 0.13 (0.07, 0.18)*     | 0.11 (0.05, 0.18)*                   |
| Gestational age at birth, wks                   | -0.03 (-0.09, 0.03)                     | -0.12 (-0.30, 0.05)    | -0.33 (-0.53, -0.13)*                |
| Birth weight, SD                                | 0.25 (0.15, 0.35)*                      | -0.17 (-0.47, 0.13)    | -0.14 (-0.49, 0.21)                  |
| Childhood body mass index, kg/m <sup>2</sup>    | -                                       | 1.98 (1.84, 2.12)*     | 2.10 (1.93, 2.27)*                   |

<sup>1</sup>Values are regression coefficients (95% Confidence Interval) from univariate regression models and reflect differences in childhood body fat distribution measures per unit change of each covariate and for different categories of each covariate as compared to the reference group. \*P-value<0.05.

**Table S2. Associations of Covariates with Childhood Blood Pressure (N = 1,125)<sup>1</sup>**

|                                                 | Systolic blood pressure (mmHg) | Diastolic blood pressure (mmHg) |
|-------------------------------------------------|--------------------------------|---------------------------------|
| Duration of menstrual cycle, days               | -0.01 (-0.35, 0.34)            | 0.10 (-0.19, 0.39)              |
| Child sex                                       |                                |                                 |
| Boys                                            | <i>Reference</i>               | <i>Reference</i>                |
| Girls                                           | 0.12 (-0.83, 1.07)             | 0.35 (-0.45, 12.14)             |
| Childhood age at outcome measurement, yr        | 3.05 (1.89, 4.21)*             |                                 |
| Maternal age, yr                                | -0.14 (-0.24, -0.03)*          | -0.12 (-0.21, -0.03)*           |
| Education                                       |                                |                                 |
| Primary                                         | 2.65 (0.43, 4.87)*             | 3.25 (1.43, 5.07)*              |
| Secondary                                       | 1.25 (0.26, 2.24)*             | 1.32 (0.49, 2.15)*              |
| Higher                                          | <i>Reference</i>               | <i>Reference</i>                |
| Ethnicity                                       |                                |                                 |
| Dutch or European                               | <i>Reference</i>               | <i>Reference</i>                |
| Non – European                                  | 1.68 (0.62, 2.73)*             | 1.51 (0.63, 2.40)*              |
| Parity                                          |                                |                                 |
| Nulliparous                                     | <i>Reference</i>               | <i>Reference</i>                |
| Multiparous                                     | -0.69 (-1.66, 0.29)            | -0.88 (-1.70, -0.06)*           |
| Prepregnancy body mass index, kg/m <sup>2</sup> | 0.25 (0.12, 0.38)*             | 0.12 (0.01, 0.23)*              |
| Diastolic blood pressure, mmHg                  | 0.10 (0.05, 0.15)*             | 0.07 (0.02, 0.11)*              |
| Smoking                                         |                                |                                 |
| Yes                                             | 0.75 (-0.39, 1.88)             | 0.67 (-0.30, 1.65)              |
| No                                              | <i>Reference</i>               | <i>Reference</i>                |
| Folic acid supplement use                       |                                |                                 |
| Yes                                             | <i>Reference</i>               | <i>Reference</i>                |
| No                                              | 1.61 (0.51, 2.71)*             | 0.56 (-0.35, 1.47)              |
| Breastfeeding duration, month)                  | -0.07 (-0.20, 0.06)            | -0.09 (-0.20, 0.03)             |
| Childhood height at outcome measurement, cm     | -                              | -                               |
| Gestational age at birth, wks                   | -0.23 (-0.51, 0.04)            | -0.03 (-0.26, 0.20)             |
| Birth weight, SD                                | -0.35 (-0.82, 0.12)            | -0.32 (-0.72, 0.08)             |
| Childhood body mass index, kg/m <sup>2</sup>    | 1.25 (0.98, 1.52)*             | 1.40 (0.42, 2.39)*              |

<sup>1</sup>Values are regression coefficients (95% Confidence Interval) from univariate regression models and reflect differences in childhood blood pressure per unit change of each covariate and for different categories of each covariate as compared to the reference group. \*P-value<0.05.

**Table S3. Associations of Covariates with Childhood Metabolic Outcomes (N = 789)<sup>1</sup>**

|                                                 | Total cholesterol<br>(mmol/l) | Triglycerides<br>(mmol/l) | Insulin<br>(pmol/l) |
|-------------------------------------------------|-------------------------------|---------------------------|---------------------|
| Duration of menstrual cycle, days               | 0.01 (-0.03, 0.04)            | 0.01 (-0.02, 0.03)        | 0.02 (-0.02, 0.06)  |
| Child sex                                       |                               |                           |                     |
| Boys                                            | <i>Reference</i>              | <i>Reference</i>          | <i>Reference</i>    |
| Girls                                           | 0.12 (0.03, 0.21)*            | 0.08 (0.02, 0.15)*        | 0.04 (-0.07, 0.15)  |
| Childhood age at outcome measurement, yr        | -0.01 (-0.12, 0.09)           | -0.02 (-0.10, 0.05)       | 0.08 (-0.05, 0.21)  |
| Maternal age, yr                                | 0 (-0.01, 0.01)               | 0 (-0.01, 0.01)           | -0.01 (-0.02, 0.01) |
| Education                                       |                               |                           |                     |
| Primary                                         | 0 (-0.23, 0.23)               | -0.04 (-0.13, 0.21)       | 0.09 (-0.21, 0.39)  |
| Secondary                                       | 0.05 (-0.04, 0.15)            | 0.01 (-0.06, 0.08)        | 0 (-0.12, 0.12)     |
| Higher                                          | <i>Reference</i>              | <i>Reference</i>          | <i>Reference</i>    |
| Ethnicity                                       |                               |                           |                     |
| Dutch or European                               | <i>Reference</i>              | <i>Reference</i>          | <i>Reference</i>    |
| Non – European                                  | 0.12 (0.01, 0.22)*            | 0 (-0.07, 0.08)           | -0.09 (-0.22, 0.04) |
| Parity                                          |                               |                           |                     |
| Nulliparous                                     | <i>Reference</i>              | <i>Reference</i>          | <i>Reference</i>    |
| Multiparous                                     | -0.02 (-0.11, 0.08)           | -0.01 (-0.08, 0.05)       | 0.05 (-0.06, 0.16)  |
| Prepregnancy body mass index, kg/m <sup>2</sup> | 0 (-0.01, 0.01)               | -0.01 (-0.02, 0)*         | 0 (-0.01, 0.02)     |
| Diastolic blood pressure, mmHg                  | 0 (-0.01, 0)                  | 0 (-0.01, 0)              | 0 (-0.01, 0.01)     |
| Smoking                                         |                               |                           |                     |
| Yes                                             | -0.03 (-0.17, 0.10)           | -0.04 (-0.12, 0.05)       | 0.11 (-0.03, 0.25)  |
| No                                              | <i>Reference</i>              | <i>Reference</i>          | <i>Reference</i>    |
| Folic acid supplement use                       |                               |                           |                     |
| Yes                                             | <i>Reference</i>              | <i>Reference</i>          | <i>Reference</i>    |
| No                                              | 0.04 (-0.06, 0.14)            | 0.04 (-0.03, 0.11)        | -0.04 (-0.16, 0.08) |
| Breastfeeding duration, month)                  | -0.01 (-0.02, 0)              | 0 (-0.01, 0.01)           | -0.01 (-0.02, 0.01) |
| Childhood height at outcome measurement, cm     | -                             | -                         | -                   |
| Gestational age at birth, wks                   | 0.01 (-0.2, 0.04)             | 0 (-0.03, 0.02)           | 0.01 (-0.03, 0.05)  |
| Birth weight, SD                                | 0 (-0.05, 0.05)               | -0.04 (-0.07, 0)          | -0.02 (-0.06, 0.02) |
| Childhood body mass index, kg/m <sup>2</sup>    | 0.03 (0, 0.06)*               | 0.02 (0, 0.04)            | 0.08 (0.05, 0.12)** |

<sup>1</sup>Values are regression coefficients (95% Confidence Interval) from univariate regression models and reflect differences in childhood blood levels per unit change of each covariate and for different categories of each covariate as compared to the reference group. \*P-value<0.05.

**Table S4. Fetal and Childhood Growth Characteristics (N = 1,184)<sup>1</sup>**

---

|                                                           |                   |
|-----------------------------------------------------------|-------------------|
| <b>Fetal growth</b>                                       |                   |
| <b>First trimester</b>                                    |                   |
| Gestational age, median (90% range), wks                  | 12.4 (11.0, 13.9) |
| First trimester fetal crown to rump length, mean (SD), mm | 61 (11)           |
| <b>Second trimester</b>                                   |                   |
| Gestational age, median (90% range), wks <sup>2</sup>     | 20.4 (19.1, 22.2) |
| Femur length, mean (SD), mm                               | 33 (3)            |
| Estimated fetal weight, mean (SD), g                      | 372 (74)          |
| <b>Third trimester</b>                                    |                   |
| Gestational age, median (90% range), wks <sup>2</sup>     | 30.3 (29.1, 32.1) |
| Femur length, mean (SD), mm                               | 58 (3)            |
| Estimated fetal weight, mean (SD), g                      | 1630 (241)        |
| <b>Birth</b>                                              |                   |
| Gestational age, median (90% range), wks <sup>2</sup>     | 40.1 (37.0, 42.0) |
| Male sex, No (%)                                          | 575 (48.6)        |
| Birth weight, mean (SD), g                                | 3456 (551)        |
| <b>Childhood growth</b>                                   |                   |
| <b>6 months</b>                                           |                   |
| Age at follow up, median (90% range), mo                  | 6.2 (5.5, 7.3)    |
| Height, mean (SD), cm                                     | 67.7 (2.5)        |
| Weight, mean (SD), kg                                     | 7.8 (0.9)         |
| <b>12 months</b>                                          |                   |
| Age at follow up, median (90% range), mo                  | 11.1 (10.2, 12.3) |
| Height, mean (SD), cm                                     | 74.4 (2.6)        |
| Weight, mean (SD), kg                                     | 9.6 (1.1)         |
| <b>24 months</b>                                          |                   |
| Age at follow up, median (90% range), mo                  | 25.0 (23.5, 27.3) |
| Height, mean (SD), cm                                     | 88.3 (3.4)        |
| Weight, mean (SD), kg                                     | 12.9 (1.5)        |
| <b>36 months</b>                                          |                   |
| Age at follow up, median (90% range), mo                  | 37.1 (35.5, 39.9) |
| Height, mean (SD), cm                                     | 97.3 (3.6)        |
| Weight, mean (SD), kg                                     | 15.2 (1.8)        |
| <b>48 months</b>                                          |                   |
| Age at follow up, median (90% range), mo                  | 46.0 (44.8, 47.9) |
| Height, mean (SD), cm                                     | 103.2 (4.1)       |
| Weight, mean (SD), kg                                     | 16.9 (2.2)        |
| <b>72 months</b>                                          |                   |



|                                          |                   |
|------------------------------------------|-------------------|
| Age at follow up, median (90% range), mo | 73.2 (68.9, 81.4) |
| Height, mean (SD), cm                    | 119.0 (5.5)       |
| Weight, mean (SD), kg                    | 22.8 (3.7)        |

---

<sup>1</sup>Values represent means (SD), median (90% range) or number of subjects (valid %)

**Table S5. Non-Response Analysis for First-Trimester Crown to Rump Length Measurement in Full Cohort (N = 8,880)<sup>1</sup>**

|                                                                 | <b>First trimester<br/>CRL<br/>measurement<br/>N = 4,195</b> | <b>No first<br/>trimester CRL<br/>measurement<br/>N = 4,685</b> | <b>p-value<sup>4</sup></b> |
|-----------------------------------------------------------------|--------------------------------------------------------------|-----------------------------------------------------------------|----------------------------|
| <b>Maternal characteristics</b>                                 |                                                              |                                                                 |                            |
| Age, median (90% range), yr                                     | 30.5 (21.1, 37.2)                                            | 29.9 (19.8, 38.4)                                               | <0.01                      |
| Height, mean (SD), cm                                           | 167.8 (7.3)                                                  | 167.1 (7.5)                                                     | <0.01                      |
| Pre-pregnancy weight, mean (SD), kg                             | 66.4 (12.6)                                                  | 66.2 (13.0)                                                     | 0.64                       |
| Pre-pregnancy body mass index, mean (SD), kg/m <sup>2</sup>     | 23.5 (4.2)                                                   | 23.8 (4.5)                                                      | 0.02                       |
| Gestational age at intake, median (90% range), wks <sup>2</sup> | 12.5 (9.9, 14.9)                                             | 16.8 (12.6, 24.6)                                               | <0.01                      |
| Systolic blood pressure, mean (SD), mmHg                        | 116.2 (12.3)                                                 | 114.7 (12.3)                                                    | <0.01                      |
| Diastolic blood pressure, mean (SD), mmHg                       | 68.8 (9.6)                                                   | 67.4 (9.5)                                                      | <0.01                      |
| Parity, nulliparous, No. (%) <sup>3</sup>                       | 1743 (42.0)                                                  | 2152 (46.7)                                                     | <0.01                      |
| Education, No. (%) <sup>3</sup>                                 |                                                              |                                                                 |                            |
| Primary or secondary school                                     | 2080 (53.3)                                                  | 2604 (62.6)                                                     | <0.01                      |
| Higher education                                                | 1826 (46.7)                                                  | 1553 (37.4)                                                     |                            |
| Race / Ethnicity, No. (%) <sup>3</sup>                          |                                                              |                                                                 |                            |
| Dutch, other European                                           | 2563 (64.7)                                                  | 2153 (50.8)                                                     | <0.01                      |
| Non-European                                                    | 1397 (35.3)                                                  | 2089 (49.2)                                                     |                            |
| Smoking habits, No. (%) <sup>3</sup>                            |                                                              |                                                                 |                            |
| None                                                            | 2715 (74.7)                                                  | 2983 (76.1)                                                     | 0.49                       |
| Yes                                                             | 920 (25.3)                                                   | 935 (23.9)                                                      |                            |
| Folic acid supplement use, No. (%) <sup>3</sup>                 |                                                              |                                                                 |                            |
| No use                                                          | 683 (21.4)                                                   | 1245 (37.0)                                                     | <0.01                      |
| First 10 weeks use                                              | 1007 (31.5)                                                  | 1033 (30.7)                                                     |                            |
| Preconception use                                               | 1504 (47.1)                                                  | 1088 (32.3)                                                     |                            |
| <b>Fetal characteristics</b>                                    |                                                              |                                                                 |                            |
| Second trimester estimated fetal weight, mean (SD),             | 369 (78)                                                     | 396 (110)                                                       | <0.01                      |
| Third trimester estimated fetal weight, mean (SD), g            | 1607 (245)                                                   | 1623 (285)                                                      | <0.01                      |
| <b>Birth characteristics</b>                                    |                                                              |                                                                 |                            |
| Males, No. (%) <sup>3</sup>                                     | 2072 (50.4)                                                  | 2295 (50.6)                                                     | 0.81                       |
| Gestational age, median (90% range), wks <sup>2</sup>           | 40.1 (36.9, 42.0)                                            | 40.0 (36.4, 42.1)                                               | <0.01                      |
| Birth weight, mean (SD), g                                      | 3421 (566)                                                   | 3398 (562)                                                      | 0.08                       |

<sup>1</sup> Values are means (standard deviation) or percentages. <sup>2</sup>Median (90% range) <sup>3</sup>Values are observed numbers and valid percentages. <sup>4</sup>Differences in subject characteristics between the groups were evaluated using one-way ANOVA tests for continuous variables and chi-square tests for proportions.

**Table S6. Non-Response Analysis for First-Trimester Crown to Rump Length With and Without Information About Last Menstrual Period and Singleton Live-born Child (N = 4,195)<sup>1</sup>**

|                                                                 | <b>Known last menstrual period and singleton live-born child</b> | <b>Unknown last menstrual period and singleton live-born child</b> | <b>p-value<sup>4</sup></b> |
|-----------------------------------------------------------------|------------------------------------------------------------------|--------------------------------------------------------------------|----------------------------|
| <b>Maternal characteristics</b>                                 |                                                                  |                                                                    |                            |
| Age, median (90% range), yr                                     | 31.4 (21.9, 37.9)                                                | 29.8 (20.6, 37.0)                                                  | <0.01                      |
| Height, mean (SD), cm                                           | 168.7 (7.0)                                                      | 167.2 (7.5)                                                        | <0.01                      |
| Pre-pregnancy weight, mean (SD), kg                             | 66.9 (11.8)                                                      | 66.2 (13.1)                                                        | 0.22                       |
| Pre-pregnancy body mass index, mean (SD), kg/m <sup>2</sup>     | 23.4 (3.8)                                                       | 23.6 (4.5)                                                         | 0.07                       |
| Gestational age at intake, median (90% range), wks <sup>2</sup> | 12.4 (10.6, 13.9)                                                | 12.5 (9.6,15.1)                                                    | 0.01                       |
| Systolic blood pressure, mean (SD), mmHg                        | 116.8 (12.5)                                                     | 115.8 (12.2)                                                       | <0.01                      |
| Diastolic blood pressure, mean (SD), mmHg                       | 69.1 (9.4)                                                       | 68.7 (9.8)                                                         | 0.16                       |
| Parity, nulliparous, No. (%) <sup>3</sup>                       | 956 (59.4)                                                       | 1451 (57.1)                                                        | 0.15                       |
| Education, No. (%) <sup>3</sup>                                 |                                                                  |                                                                    |                            |
| Primary or secondary school                                     | 703 (45.4)                                                       | 1377 (58.4)                                                        | <0.01                      |
| Higher education                                                | 845 (54.6)                                                       | 981 (41.6)                                                         |                            |
| Race / Ethnicity, No. (%) <sup>3</sup>                          |                                                                  |                                                                    |                            |
| Dutch, other European                                           | 1106 (70.7)                                                      | 1457 (60.8)                                                        | <0.01                      |
| Non-European                                                    | 458 (29.3)                                                       | 939 (39.2)                                                         |                            |
| Smoking habits, No. (%) <sup>3</sup>                            |                                                                  |                                                                    |                            |
| None                                                            | 1110 (76.8)                                                      | 1605 (73.3)                                                        | 0.13                       |
| Yes                                                             | 336 (23.2)                                                       | 584 (26.7)                                                         |                            |
| Folic acid supplement use, No. (%) <sup>3</sup>                 |                                                                  |                                                                    |                            |
| No use                                                          | 192 (14.7)                                                       | 491 (26.0)                                                         | <0.01                      |
| First 10 weeks use                                              | 415 (31.8)                                                       | 592 (31.3)                                                         |                            |
| Preconception use                                               | 696 (53.4)                                                       | 808 (42.7)                                                         |                            |
| <b>Fetal characteristics</b>                                    |                                                                  |                                                                    |                            |
| Second trimester estimated fetal weight, mean (SD),             | 371 (74)                                                         | 368 (81)                                                           | 0.33                       |
| Third trimester estimated fetal weight, mean (SD), g            | 1622 (240)                                                       | 1598(247)                                                          | <0.01                      |
| <b>Birth characteristics</b>                                    |                                                                  |                                                                    |                            |
| Males, No. (%) <sup>3</sup>                                     | 802 (49.5)                                                       | 1270 (50.9)                                                        | 0.39                       |
| Gestational age, median (90% range), wks <sup>2</sup>           | 39.9 (37.1, 42.0)                                                | 39.8 (36.7, 42.0)                                                  | 0.04                       |
| Birth weight, mean (SD), g                                      | 3453 (565)                                                       | 3402 (564)                                                         | <0.01                      |

<sup>1</sup> Values are means (standard deviation) or percentages. <sup>2</sup>Median (90% range) <sup>3</sup>Values are observed numbers and valid percentages. <sup>4</sup>Differences in subject characteristics between the groups were evaluated using one-way ANOVA tests for continuous variables and chi-square tests for proportions.

**Table S7. Non-Response Analysis for Loss to Follow-Up at the Age of 6 Years (N = 1,619)<sup>1</sup>**

|                                                                 | Follow-up at 6<br>years<br>N = 1,184 | Loss to follow-<br>up at 6 years<br>N = 435 | p-value <sup>4</sup> |
|-----------------------------------------------------------------|--------------------------------------|---------------------------------------------|----------------------|
| <b>Maternal characteristics</b>                                 |                                      |                                             |                      |
| Age, median (90% range), yr                                     | 31.3 (22.7, 38.1)                    | 29.7 (5.0)                                  | <0.01                |
| Height, mean (SD), cm                                           | 168.8 (7.0)                          | 168.5 (7.1)                                 | 0.43                 |
| Pre-pregnancy weight, mean (SD), kg                             | 66.9 (11.8)                          | 66.0 (11.9)                                 | 0.22                 |
| Pre-pregnancy body mass index, mean (SD), kg/m <sup>2</sup>     | 23.4 (3.9)                           | 23.2 (3.7)                                  | 0.29                 |
| Gestational age at intake, median (90% range), wks <sup>2</sup> | 12.4 (10.5, 13.9)                    | 12.4 (10.9, 13.9)                           | 0.84                 |
| Systolic blood pressure, mean (SD), mmHg                        | 116.7 (12.4)                         | 116.8 (12.8)                                | 0.87                 |
| Diastolic blood pressure, mean (SD), mmHg                       | 69.1 (9.4)                           | 69.1 (9.6)                                  | 0.93                 |
| Parity, nulliparous, No. (%) <sup>3</sup>                       | 717 (60.8)                           | 237 (55.2)                                  | 0.04                 |
| Education, No. (%) <sup>3</sup>                                 |                                      |                                             |                      |
| Primary or secondary school                                     | 507 (43.9)                           | 198 (49.5)                                  | 0.02                 |
| Higher education                                                | 648 (56.1)                           | 202 (50.5)                                  |                      |
| Race / Ethnicity, No. (%) <sup>3</sup>                          |                                      |                                             |                      |
| Dutch, other European                                           | 855 (72.8)                           | 258 (63.1)                                  | <0.01                |
| Non-European                                                    | 320 (27.2)                           | 151 (36.9)                                  |                      |
| Smoking habits, No. (%) <sup>3</sup>                            |                                      |                                             |                      |
| None                                                            | 820 (77.4)                           | 290 (75.1)                                  | 0.38                 |
| Yes                                                             | 240 (22.6)                           | 96 (24.9)                                   |                      |
| Folic acid supplement use, No. (%) <sup>3</sup>                 |                                      |                                             |                      |
| No use                                                          | 119 (12.5)                           | 73 (20.6)                                   | <0.01                |
| First 10 weeks use                                              | 294 (31.0)                           | 121 (34.2)                                  |                      |
| Preconception use                                               | 536 (56.5)                           | 160 (45.2)                                  |                      |
| <b>Fetal characteristics</b>                                    |                                      |                                             |                      |
| First trimester crown to rump length, mean (SD), mm             | 61 (11)                              | 61 (11)                                     | 0.44                 |
| Second trimester estimated fetal weight, mean (SD), g           | 372 (74)                             | 368 (73)                                    | 0.34                 |
| Third trimester estimated fetal weight, mean (SD), g            | 1630 (241)                           | 1599 (238)                                  | 0.02                 |
| <b>Birth and infant characteristics</b>                         |                                      |                                             |                      |
| Males, No. (%) <sup>3</sup>                                     | 575 (48.6)                           | 226 (52.1)                                  | 0.21                 |
| Gestational age, median (90% range), wks <sup>2</sup>           | 40.1 (37.0, 42.0)                    | 40.3 (37.1, 42.1)                           | 0.89                 |
| Birth weight, mean (SD), g                                      | 3456 (551)                           | 3444 (602)                                  | 0.70                 |
| Ever breastfeeding, No (%)                                      |                                      |                                             |                      |
| No                                                              | 80 (7.6)                             | 36 (12.6)                                   | 0.01                 |
| Yes                                                             | 966 (92.4)                           | 250 (87.4)                                  |                      |
| Breastfeeding duration, mean (SD), mo                           | 5.3 (3.8)                            | 4.6 (3.8)                                   | 0.02                 |

<sup>1</sup> Values are means (standard deviation) or percentages. <sup>2</sup> Median (90% range) <sup>3</sup> Values are observed numbers and valid percentages. <sup>4</sup> Differences in subject characteristics between the groups were evaluated using one-way ANOVA tests for continuous variables and chi-square tests for proportions.

**Table S8. Fetal and Childhood Length and Weight Growth in Children with Clustering of Cardiovascular Risk Factors Adjusted for Confounders (N = 745)<sup>1</sup>**

|                        | <b>SDS - difference (95% Confidence Interval) in Growth Characteristics in Children with Clustering of Cardiovascular Risk Factors</b> |                             |
|------------------------|----------------------------------------------------------------------------------------------------------------------------------------|-----------------------------|
|                        | <b>Length (SDS)</b>                                                                                                                    | <b>Weight (SDS)</b>         |
| <b>Gestational age</b> |                                                                                                                                        |                             |
| 20 weeks               | -0.11 (-0.32, 0.10)                                                                                                                    | -0.15 (-0.36, 0.06)         |
| 30 weeks               | -0.10 (-0.31, 0.12)                                                                                                                    | <b>-0.24 (-0.44, -0.03)</b> |
| 40 weeks               | -0.09 (-0.39, 0.22)                                                                                                                    | <b>-0.32 (-0.59, -0.05)</b> |
| <b>Childhood age</b>   |                                                                                                                                        |                             |
| 6 months               | 0.02 (-0.18, 0.23)                                                                                                                     | 0.24 (-0.04, 0.51)          |
| 12 months              | 0.07 (-0.14, 0.27)                                                                                                                     | <b>0.31 (0.03, 0.58)</b>    |
| 24 months              | 0.16 (-0.04, 0.36)                                                                                                                     | <b>0.45 (0.18, 0.72)</b>    |
| 36 months              | <b>0.26 (0.05, 0.45)</b>                                                                                                               | <b>0.59 (0.32, 0.86)</b>    |
| 48 months              | <b>0.35 (0.15, 0.55)</b>                                                                                                               | <b>0.73 (0.45, 1.00)</b>    |
| 72 months              | <b>0.54 (0.32, 0.75)</b>                                                                                                               | <b>1.09 (0.71, 1.31)</b>    |

<sup>1</sup>Values are based on repeated linear regression models. Regression coefficients (95% confidence interval) reflect the difference in length and weight standard deviation score for children with clustering of cardiovascular risk factors, as compared to children without this clustering. Models are adjusted for duration of last menstrual cycle, child sex and age at outcome measurements, maternal age, educational level, ethnicity, parity, pre-pregnancy body mass index, diastolic blood pressure, smoking during pregnancy and folic acid supplement use, breastfeeding duration. Length and weight growth characteristics used in the models: Fetal period: first trimester: crown to rump length as both length and weight measure (starting point); second and third trimester: femur length and estimated fetal weight; At birth: birth length and birth weight; During childhood: length and weight. Clustering of cardiovascular and metabolic risk factors, was defined as having 3 or more following components: android fat mass % =>75th percentile; systolic or diastolic blood pressure =>75th percentile; HDL-cholesterol <=25th percentile or triglycerides => 75th percentile; and insulin level =>75th percentile [22].
